# Supplementary material
Source: PubMed Central journal article supplement (PMC3073292)
Supplement: cib0401_0118SD1.pdf [file cib0401_0118SD1.pdf]

**Supplementary Table 1** - RNA helicases from *P. falciparum* with Gene Ids, annotations as referred in the PlasmoDB database, and names for putative helicases confirmed based on BLAST search.

| <b>S. No.</b> | <b>Gene Id</b> | <b>Database annotation</b>    | <b>Given name</b> |
|---------------|----------------|-------------------------------|-------------------|
| 1             | PFD1060w       | U5.snRNP                      | U5.snRNP          |
| 2             | PF11_0053      | PfSNF2L                       | PfSNF2L           |
| 3             | PFE1085w       | DEAD-box                      | DDX1              |
| 4             | PF14_0655      | helicase 45                   | DDX2A             |
| 5             | PF08_0096      | RNA helicase                  | DDX3X             |
| 6             | PFC0915w       | RNA helicase                  | DDX6              |
| 7             | PF14_0081      | DNA-repair helicase           | DDX11             |
| 8             | MAL13P1.134    | DEAD-box                      | DDX12             |
| 9             | PFI0480w       | helicase with Zn-finger motif | DDX13             |
| 10            | PF14_0437      | helicase                      | DDX17             |
| 11            | PFF1500c       | DEAD/DEAH-box                 | DDX18             |
| 12            | PFE0215w       | helicase                      | DDX21             |
| 13            | PFL2475w       | DEAD/DEAH-box                 | DDX27             |
| 14            | MAL7P1.113     | DEAD-box                      | DDX31             |
| 15            | PFB0445c       | UAP56                         | DDX39             |
| 16            | PFE1390w       | RNA-helicase 1                | DDX41             |
| 17            | PFE0430w       | RNA helicase                  | DDX46             |
| 18            | PFB0860c       | DEAD/DEAH-box                 | DDX47             |
| 19            | PFD1070w       | eIF                           | eIF4A3            |
| 20            | MAL8P1.19      | RNA helicase                  | DDX54             |
| 21            | PFI0165c       | DEAD/DEAH-box                 | DDX60             |
| 22            | PF10_0294      | RNA helicase                  | DHX8              |
| 23            | PFI0860c       | RNA helicase                  | DHX15             |
| 24            | MAL13P1.322    | splicing factor               | DHX38             |
| 25            | PFF1140c       | DEAD-box                      | SUPV3L1           |
| 26            | PFF0100w       | RNA helicase                  | SKIV2L2           |

**Supplementary Table 2** - DNA helicases from *P. falciparum* with Gene Ids, annotations as referred in the PlasmoDB database, and names for putative helicases confirmed based on BLAST search.

| <b>S.No.</b> | <b>Gene Id</b> | <b>Database annotation</b>                       | <b>Given name</b> |
|--------------|----------------|--------------------------------------------------|-------------------|
| 1            | PFI0910w       | DNA helicase                                     | BLM               |
| 2            | PF14_0278      | DNA helicase                                     | WRN               |
| 3            | PF14_0177      | MCM2                                             | MCM2              |
| 4            | PFE1345c       | MCM3                                             | MCM3              |
| 5            | PF13_0095      | MCM4-related                                     | MCM4              |
| 6            | PFL0580w       | MCM5                                             | MCM5              |
| 7            | PF13_0291      | Replication licensing factor                     | MCM6              |
| 8            | PF07_0023      | MCM7                                             | MCM7              |
| 9            | PFL0560c       | MCM protein                                      | MCM8              |
| 10           | PF13_0291      | Replication licensing factor                     | MCM9              |
| 11           | PF10_0369      | DNA repair helicase rad25<br>DNA excision-repair | XPB               |
| 12           | PFI1650w       | helicase                                         | XPD               |
| 13           | PFB0730w       | DEAD/DEAH box helicase                           | HELLS             |
| 14           | PF08_0048      | ATP-dependent helicase                           | INOC1             |
| 15           | PF11_0071      | RuvB DNA helicase                                | RuvB              |
| 16           | PF13_0330      | DNA helicase                                     | RuvB-like         |

## **Legends for supplementary figures**

**Supplementary Figure 1:** Phylogenetic relationships of 14 DHX are constructed on entire protein sequences with MEGA4 alignment program. The phylogenetic tree is bootstrapped for 100 replicates. The bootstrap values at each node are indicated with numbers. The un-rooted tree is scaled for 0.05 substitutions per sequence position.

**Supplementary Figure 2:** Phylogeny for 37 DDX-type RNA helicases is built based on entire protein sequences with MEGA4 software. Bootstrap for 100 replicates; scale = 0.05 substitutions per sequence position.

**Supplementary Figure 3:** Phylogeny of RecQ helicase members drawn with MEGA4 software to scale 0.1 with 100 bootstrap replicates. Note that RecQ2, RecQ3 and RecQ4 are also called as Bloom (BLM), Werner (WRN), and Rothmund-Thomson syndrome (RTS) respectively.

**Supplementary Figure 4:** Phylogenetic analysis of MCM (2-7, 8, 9) proteins constructed on entire protein sequences with MEGA4 software. Scale is 0.05, bootstrap for 100 replicates.

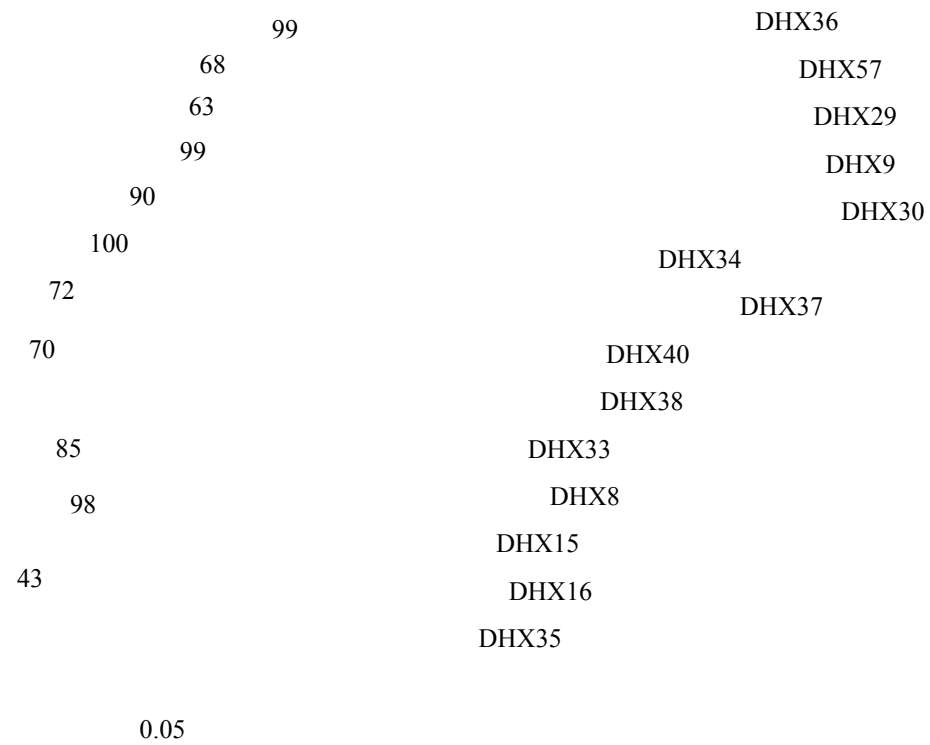

**Supplementary Fig. 1**

|    |     |     |        |
|----|-----|-----|--------|
|    |     | 100 | DDX2A  |
|    |     | 100 | DDX2B  |
|    | 78  |     | DDX48  |
|    |     | 100 | DDX19A |
|    |     |     | DDX19B |
|    | 89  | 100 | DDX25  |
|    |     | 100 | DDX39  |
|    | 62  |     | BAT1   |
| 71 |     |     | DDX20  |
| 40 |     |     | DDX6   |
|    |     |     | DDX21  |
|    |     | 100 | DDX50  |
|    |     | 100 | DDX3X  |
|    |     |     | DDX3Y  |
| 20 | 100 |     | DDX4   |
|    |     | 100 | DDX5   |
|    | 62  | 71  | DDX17  |
|    |     |     | DDX43  |
|    |     | 100 | DDX53  |
|    | 21  |     | DDX46  |
| 24 |     |     | DDX23  |
| 33 | 17  |     | DDX42  |
|    | 35  |     | DDX41  |
|    |     |     | DDX52  |
|    | 66  |     | DDX59  |
|    |     |     | DDX27  |
|    | 58  |     | DDX54  |
|    |     | 97  | DDX10  |
|    | 99  |     | DDX18  |
| 67 |     |     | DDX55  |
|    |     |     | DDX31  |
| 16 | 66  |     | DDX56  |
|    |     |     | DDX51  |
| 24 |     |     | DDX28  |
|    | 96  |     | DDX47  |
|    |     |     | DDX49  |
| 69 |     |     | DDX24  |

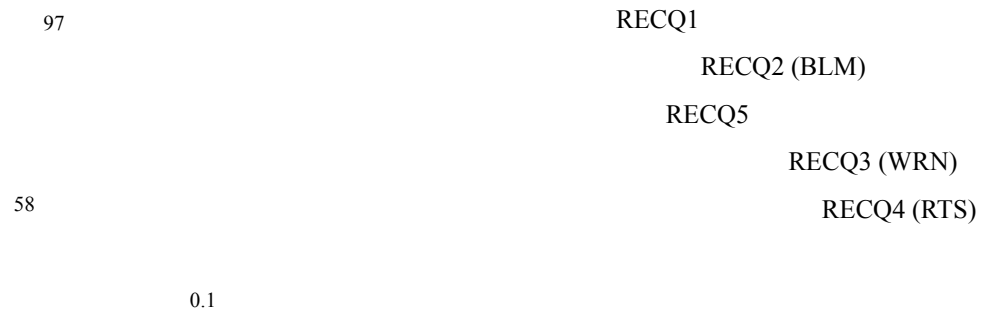

**Supplementary Fig. 3**

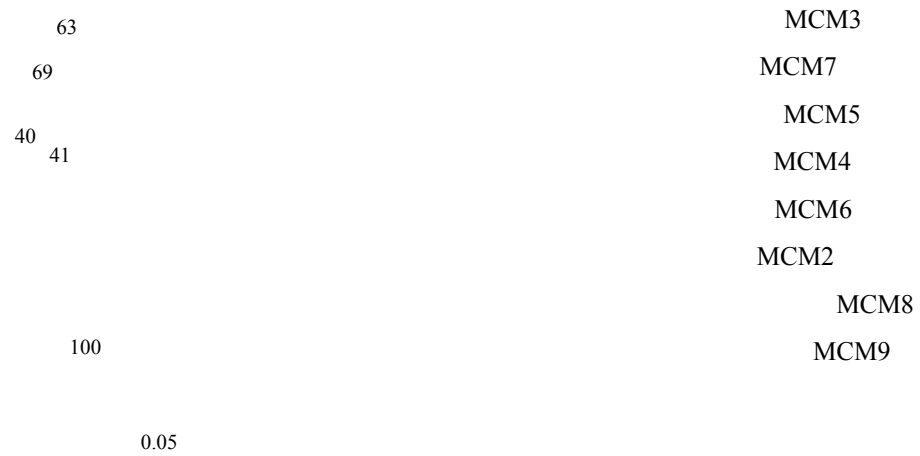

**Supplementary Fig. 4**
